# Supplementary material for: Identifying a High Fraction of the Human Genome to be under Selective Constraint Using GERP++
Source: PubMed Central journal article supplement (PMC2996323; doi:10.1371/journal.pcbi.1001025), 2010-12-02

**A** Distribution of GERP++ Element Lengths

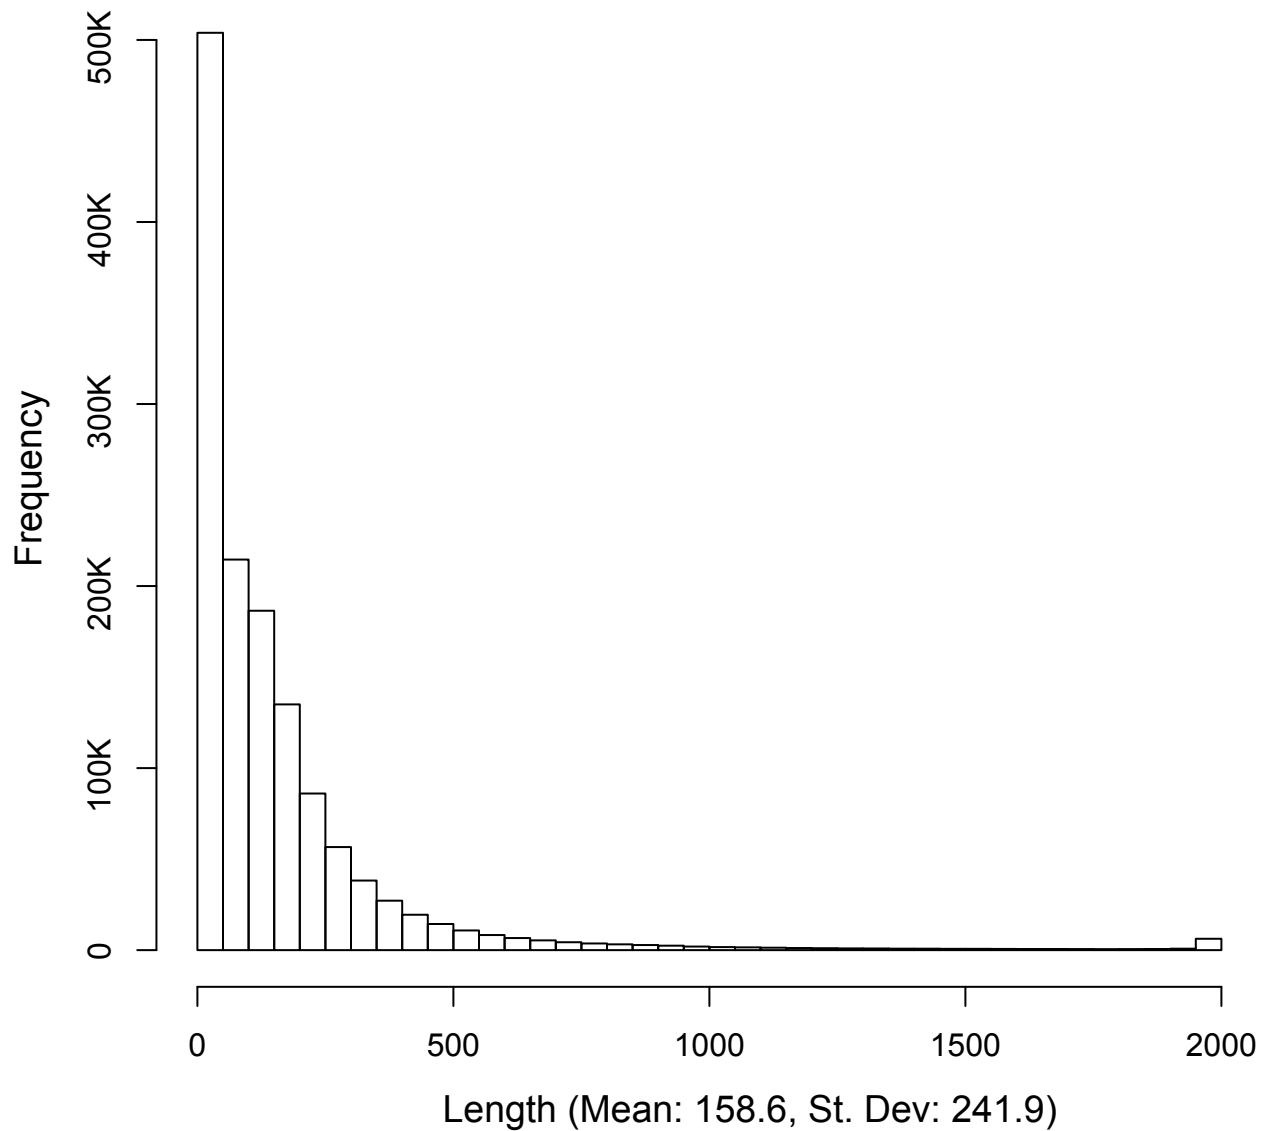

**B** Distribution of PhastCons Element Lengths

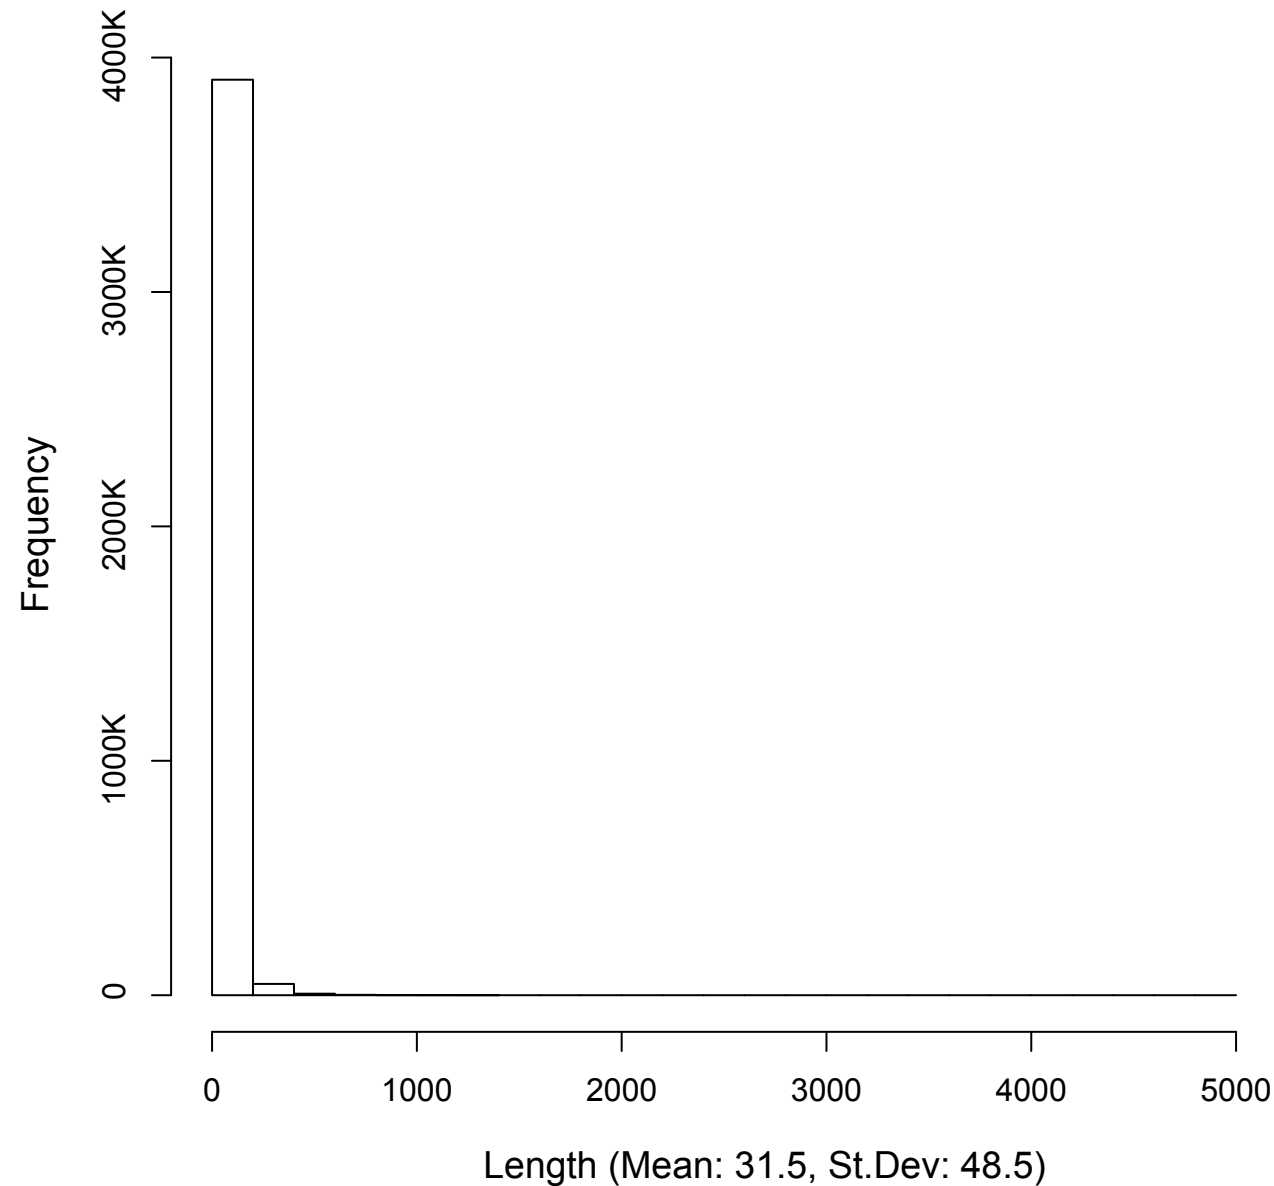

Supplement: pcbi.1001025.s002.pdf [file pcbi.1001025.s002.pdf]
